# Supplementary material
Source: PubMed Central journal article supplement (PMC4670288)
Supplement: NIHMS709593-supplement-Supp_MaterialS1.pdf [file NIHMS709593-supplement-Supp_MaterialS1.pdf]

## Additional file 1

### Tables

**AF1 Table 1 Description of the trading practices for slaughter pigs among slaughterhouses and middlemen**

|                                                                   |                      | Traders in collective<br>slaughterhouses<br>(n=2) | Local<br>slaughterhouses<br>(n=9) | Middlemen<br>(n=5)                                   |
|-------------------------------------------------------------------|----------------------|---------------------------------------------------|-----------------------------------|------------------------------------------------------|
| <b>Average number of pigs slaughtered or purchased (Min -Max)</b> | <b>Usual days</b>    | 122 (90-155)<br>per day                           | 14 (2-30)<br>per day              | 9334 (540-29783)<br>for the 1.5 year<br>study period |
|                                                                   | <b>During Tet</b>    | 155 (125-185)<br>per day                          | 27 (5-75)<br>per day              |                                                      |
| <b>Overall percentage of pigs purchased from:</b>                 | <b>Companies</b>     | 56.7%                                             | 15.4%                             | 25.2%                                                |
|                                                                   | <b>Large farms</b>   | 42.4%                                             | 65.2%                             | 43.7%                                                |
|                                                                   | <b>Small farms</b>   | 0.4%                                              | 14.6%                             | 24.9%                                                |
|                                                                   | <b>Other traders</b> | 0.5%                                              | 4.8%                              | 6.2%                                                 |

**AF1 Table 2 Distribution of the farms hiring boars across the farm and network classes**

| Class                    | VB            | LB            | SB              | LF            | SF              |
|--------------------------|---------------|---------------|-----------------|---------------|-----------------|
| <b>Isolated farms</b>    | -             | -             | 16 (11 ; 5)     | -             | 5 (4 ; 1)       |
| <b>Primary sinks</b>     | -             | -             | -               | 1 (0 ; 1)     | 9 (3 ; 6)       |
| <b>Secondary sinks</b>   | -             | 1 (1 ; 0)     | 1 (0 ; 1)       | -             | 9 (7 ; 2)       |
| <b>Sources</b>           | -             | -             | -               | -             | -               |
| <b>Total no of farms</b> | <b>0 (0%)</b> | <b>1 (5%)</b> | <b>17 (68%)</b> | <b>1 (7%)</b> | <b>23 (32%)</b> |

Percentages of farms hiring boars over the total of farms per farm class.

**AF1 Table 3 Median (Min-Max) of the different typology variables for farms involved in boar hiring**

| Boar hiring     | Class                  | Out-degree | Trade weighted out-degree | Pig weighted out-degree | In-degree | Trade weighted in-degree | Pig weighted in-degree | Total no of farms |
|-----------------|------------------------|------------|---------------------------|-------------------------|-----------|--------------------------|------------------------|-------------------|
| <b>Excluded</b> | <b>Isolated farms</b>  | 0 (0-4)    | 0 (0-5)                   | 0 (0-60)                | 1 (0-1)   | 1 (0-2)                  | 1 (0-40)               | <b>21 (62%)</b>   |
|                 | <b>Primary sinks</b>   | 0 (0-0)    | 0 (0-0)                   | 0 (0-0)                 | 3 (2-5)   | 5 (3-8)                  | 131 (30-340)           | <b>10 (21%)</b>   |
|                 | <b>Secondary sinks</b> | 0 (0-2)    | 0 (0-2)                   | 0 (0-50)                | 2 (1-2)   | 3 (1-5)                  | 39 (7-150)             | <b>11 (26%)</b>   |
| <b>Included</b> | <b>Isolated farms</b>  | 1 (1-5)    | 10 (1-50)                 | 12 (1-87)               | 2 (1-3)   | 10 (1-45)                | 14 (1-52)              | <b>21 (62%)</b>   |
|                 | <b>Primary sinks</b>   | 1 (1-2)    | 18 (4-60)                 | 18 (4-60)               | 4 (3-6)   | 24 (8-65)                | 142 (38-370)           | <b>10 (21%)</b>   |
|                 | <b>Secondary sinks</b> | 1 (1-3)    | 10 (1-45)                 | 10 (1-68)               | 3 (2-4)   | 11 (3-49)                | 51 (18-175)            | <b>11 (26%)</b>   |

Percentages of farms hiring boars over the total of farms per network class.

## Figures

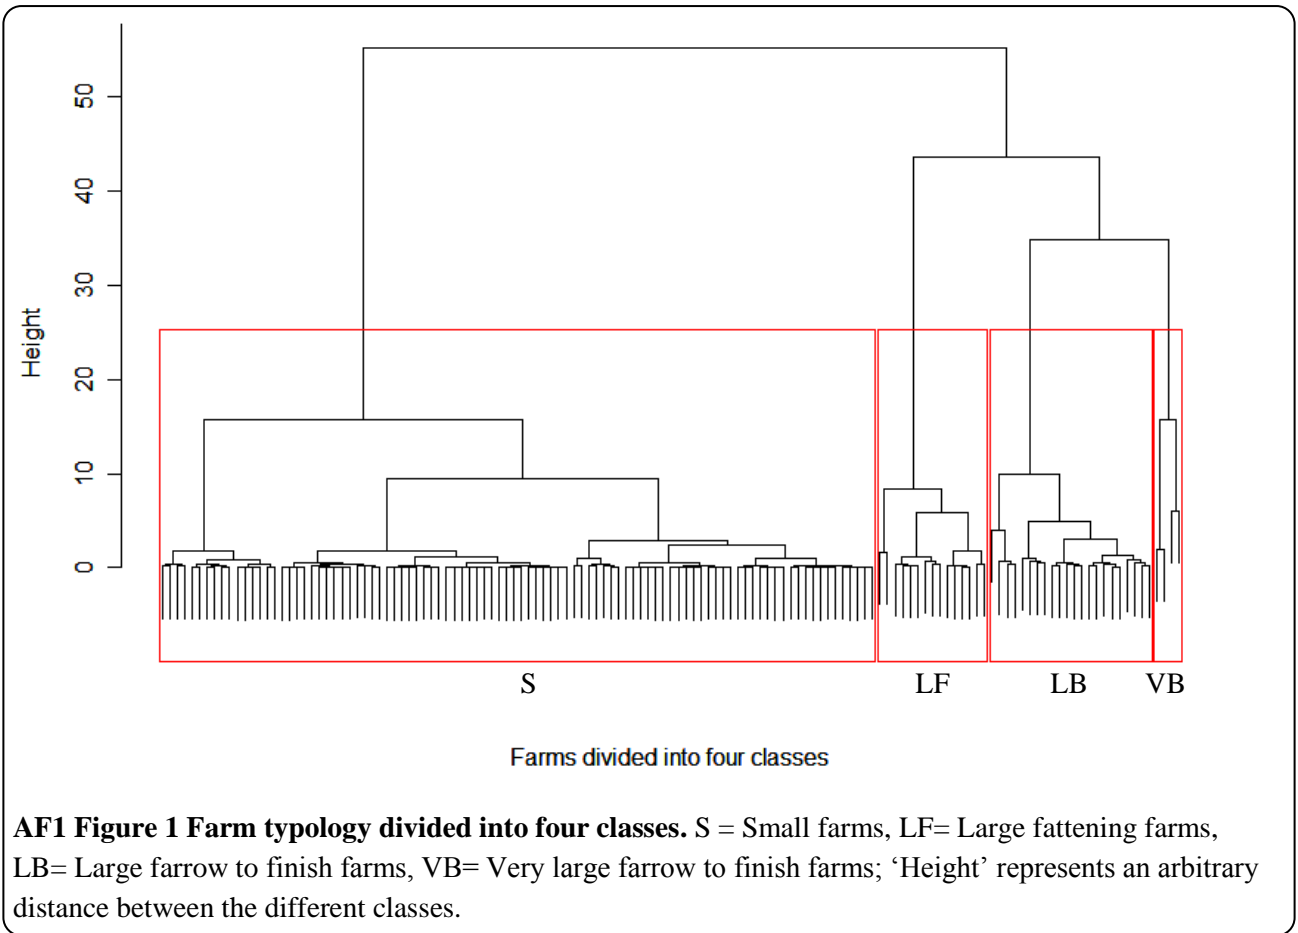

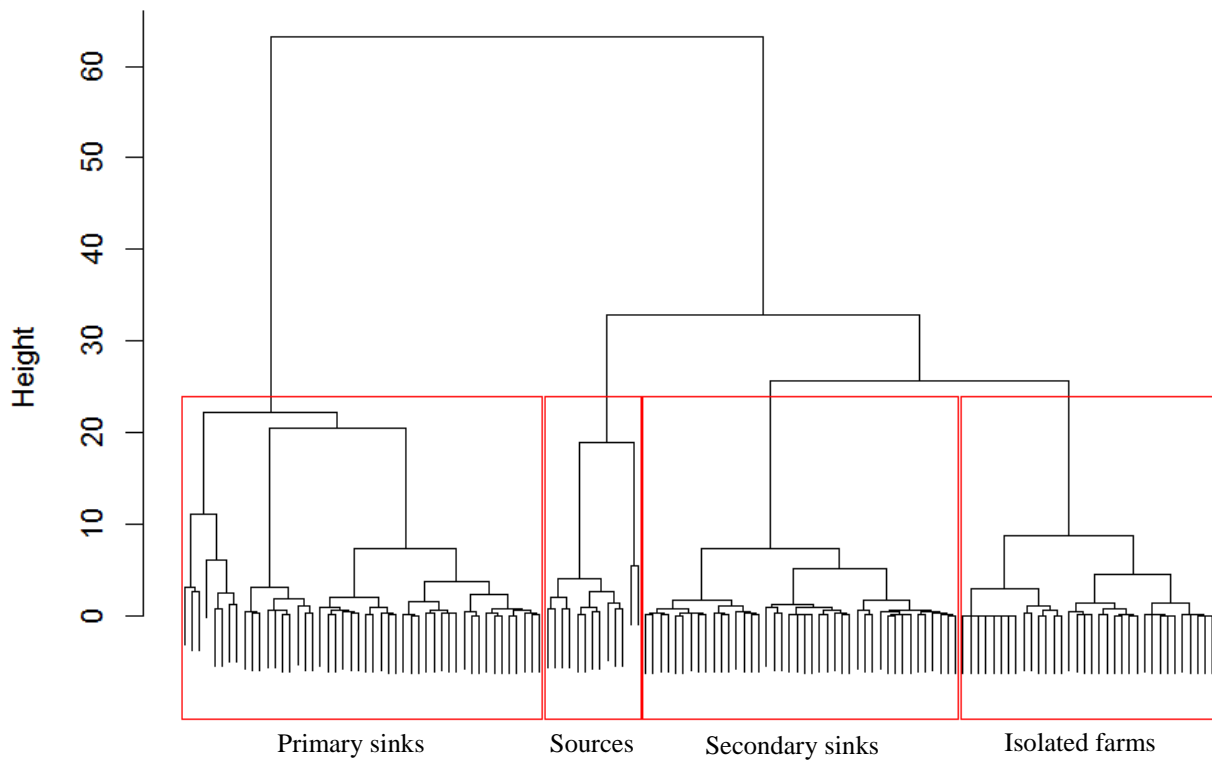

Farms divided into four classes

**AF1 Figure 2 Network typology divided into four classes.** ‘Height’ represents an arbitrary distance between the different classes.

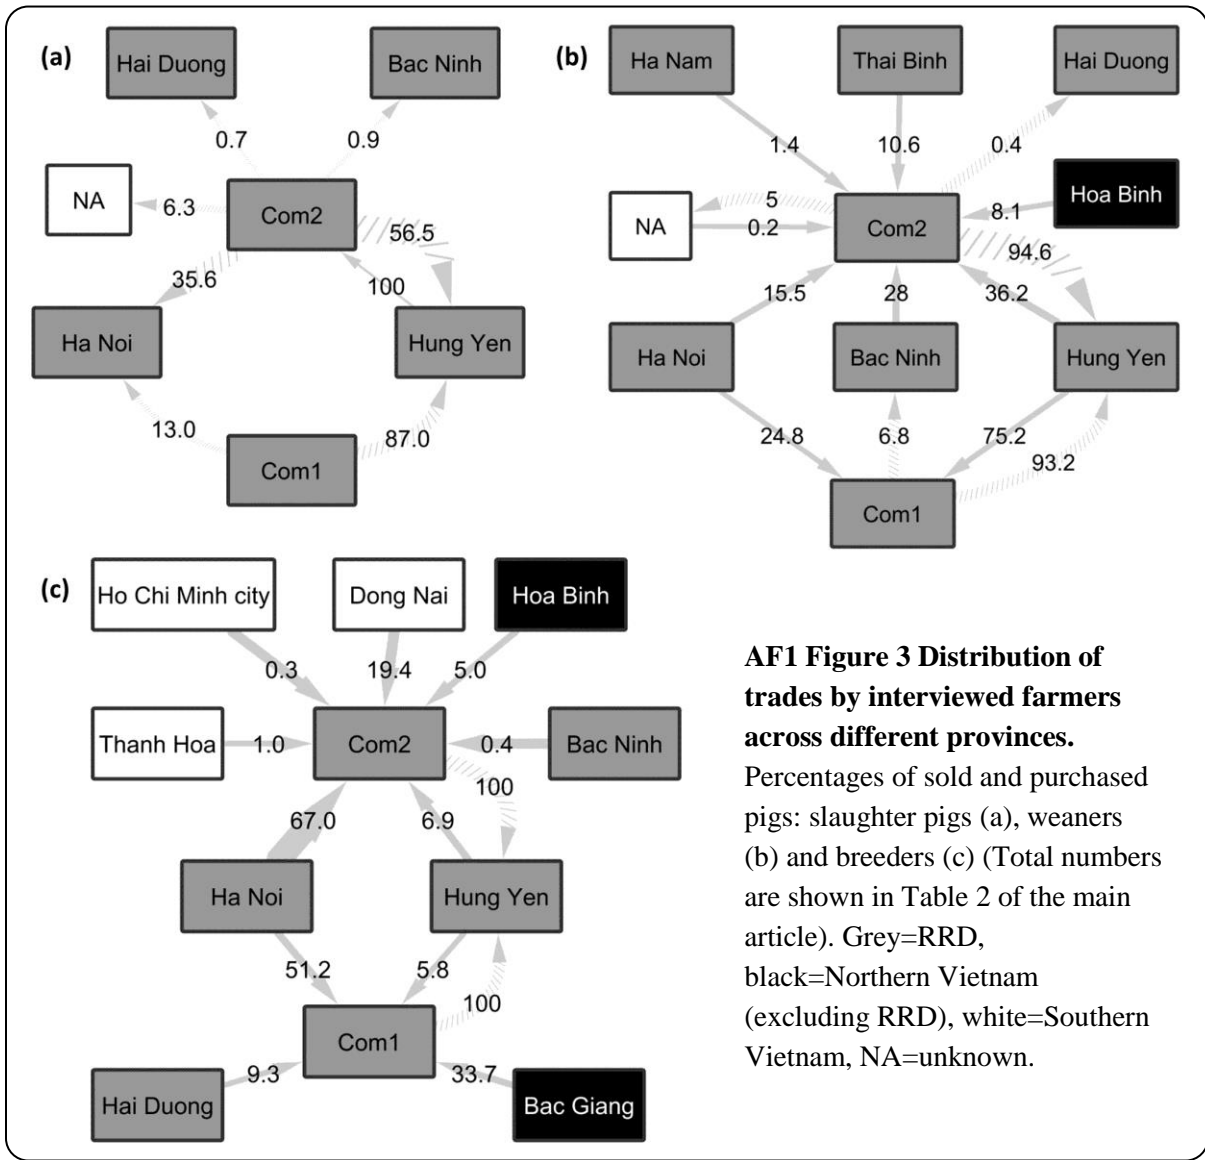

**AF1 Figure 3 Distribution of trades by interviewed farmers across different provinces.** Percentages of sold and purchased pigs: slaughter pigs (a), weaners (b) and breeders (c) (Total numbers are shown in Table 2 of the main article). Grey=RRD, black=Northern Vietnam (excluding RRD), white=Southern Vietnam, NA=unknown.

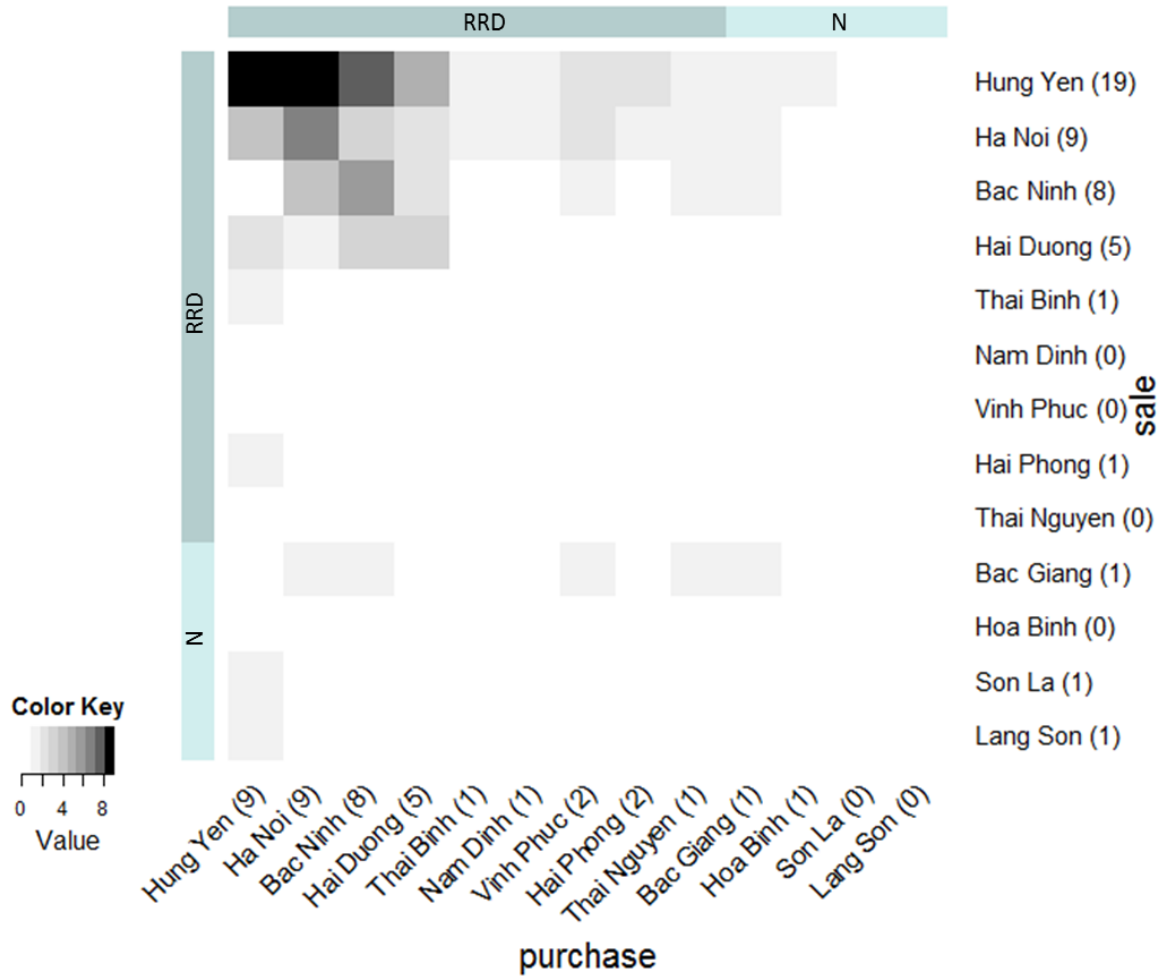

**AF1 Figure 4 Number of middlemen and market traders (N=19) purchasing and selling weaners in different provinces.** Province name (total number of middlemen who mentioned the province); RRD= Red River Delta, N=North; For a trader (i), with  $A_i$ =provinces cited for purchase and  $B_i$ =provinces cited for sales,  $\text{Median}[(A_i \cap B_i)/(A_i \cup B_i)]=0.5$ .

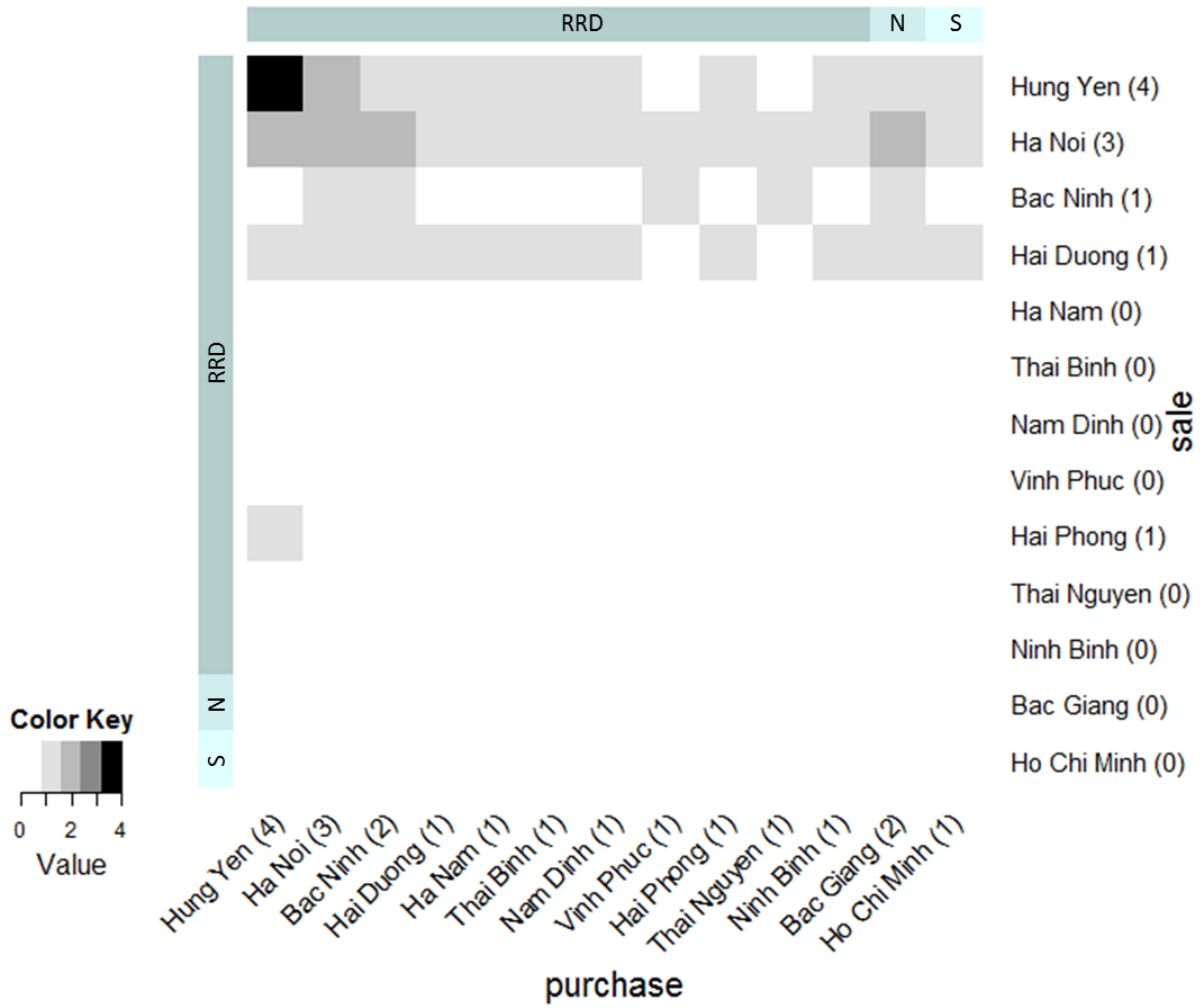

**AF1 Figure 5 Number of middlemen (N=5) purchasing and selling fattening pigs in different provinces.** Province name (total number of middlemen who mentioned the province); RRD=Red River Delta, N=North; For a trader (i), with  $A_i$ =provinces cited for purchase and  $B_i$ =provinces cited for sales,  $\text{Median}[(A_i \cap B_i)/(A_i \cup B_i)]=0.4$ .
